# Supplementary material for: Recovery of Added-Value Compounds from Orange and Spinach Processing Residues: Green Extraction of Phenolic Compounds and Evaluation of Antioxidant Activity
Source: MDPI journal article supplement (doi:10.3390/antiox10111800), 2021-11-11
Supplement: s1 [file s1]

## Supplementary material of

### **Recovery of added-value compounds from orange and spinach processing residues: green extraction of phenolic compounds and evaluation of antioxidant activity**

María Fernanda Montenegro-Landívar<sup>1,2</sup>, Paulina Tapia-Quirós<sup>1,2</sup>, Xanel Vecino<sup>1,2,3\*</sup>,  
Mònica Reig<sup>1,2</sup>, César Valderrama<sup>1,2</sup>, Mercè Granados<sup>4</sup>, José Luis Cortina<sup>1,2,5</sup>, Javier  
Saurina<sup>4</sup>

<sup>1</sup>*Chemical Engineering Department, Campus Diagonal-Besòs, Escola d'Enginyeria de  
Barcelona Est (EEBE), Universitat Politècnica de Catalunya (UPC)-BarcelonaTECH, C/  
Eduard Maristany 10-14, 08930 Barcelona, Spain.*

<sup>2</sup>*Barcelona Research Center for Multiscale Science and Engineering, Campus Diagonal-  
Besòs, 08930 Barcelona, Spain.*

<sup>3</sup>*Chemical Engineering Department, Campus As Lagoas-Marcosende, School of Industrial  
Engineering-CINTECX, University of Vigo, 36310 Vigo, Spain.*

<sup>4</sup>*Department of Chemical Engineering and Analytical Chemistry, Universitat de Barcelona,  
Diagonal 645, 08028 Barcelona, Spain.*

<sup>5</sup>*CETAQUA, Carretera d'Esplugues, 75, 08940 Cornellà de Llobregat, Spain.*

*\*Corresponding author: xavi.saurina@ub.edu*

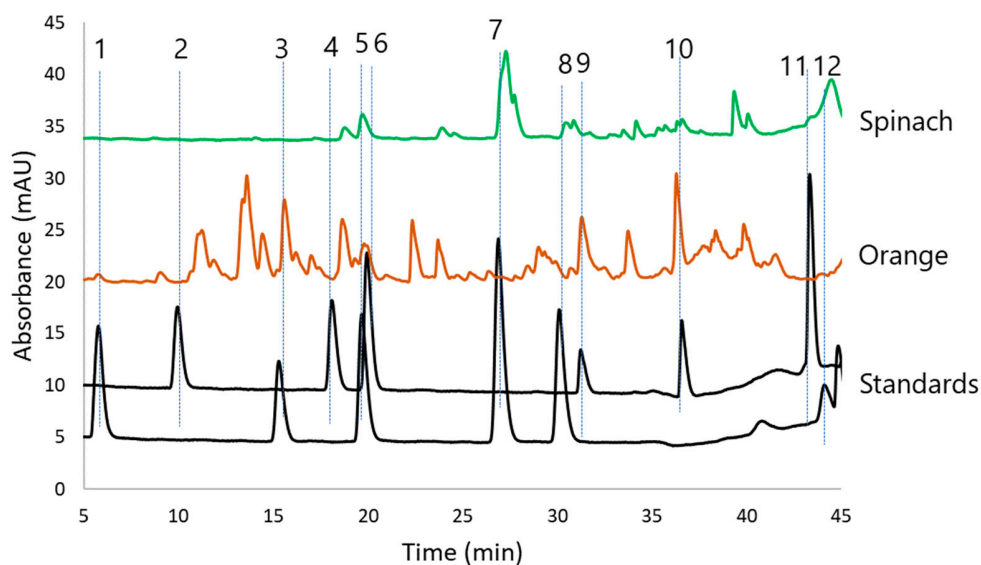

**Figure S1:** Chromatograms of a set of standards at  $20 \text{ mg L}^{-1}$  each (black lines), an orange extract (brown line), and a spinach extract (green line) recorded at 280 nm to be used for identification purposes. Selected extraction conditions for orange waste: MSE, temperature  $70^{\circ}\text{C}$ , solid/solvent ratio 1:100 (w:v) and pH 4, time 15 min. Selected extraction conditions for spinach waste: MSE, temperature  $50^{\circ}\text{C}$ , solid/solvent ratio 1:50 (w:v) and pH 6, time 5 min). Peak assignment: 1 = Gallic acid, 2 = 3,4-Dihydroxybenzoic acid, 3 = 4-Hydroxybenzoic acid, 4 = Syringic acid, 5 = Vanillic acid, 6 = Caffeic acid, 7 = *p*-Coumaric acid, 8 = Ferulic acid, 9 = Rutin, 10 = Hesperidin, 11 = Naringenin, 12 = Kaempferol.

**Table S1.** Performed variables for the optimization of phenolic compounds extraction.

| Assay        | R-value |
|--------------|---------|
| FRAP vs DPPH | 0.807   |
| FRAP vs ABTS | 0.933   |
| DPPH vs ABTS | 0.798   |
| FC vs FRAP   | 0.845   |
| FC vs DPPH   | 0.660   |
| FC vs ABTS   | 0.905   |

**Table S2.** Correlation studies among FRAP, DPPH, ABTS and FC.

| Experimental variables             | Levels                                | Optima conditions<br>orange waste | Optima conditions<br>spinach residue |
|------------------------------------|---------------------------------------|-----------------------------------|--------------------------------------|
| Temperature (°C)                   | 25 / 50 / 70 / 90                     | 70                                | 50                                   |
| Contact time (min)                 | 5 / 15 / 30                           | 15                                | 5                                    |
| Solid/solvent ratio ( <i>w:v</i> ) | 1:10 / 1:30 / 1:50 /<br>1:100 / 1:200 | 1:100                             | 1:50                                 |
| pH                                 | 3 / unadjusted / 10                   | unadjusted                        | unadjusted                           |
